# Supplementary material
Source: PubMed Central journal article supplement (PMC4014242)
Supplement: ijcep0007-1616-f4.pdf [file ijcep0007-1616-f4.pdf]

## Uterine sarcoma in China 1988-2007

**Supplementary Table 1.** Analysis of clinical presentation of 80 uterine sarcomas in Changhai Hospital

| Earliest presentation                                                 | Patient Number | Percentage |
|-----------------------------------------------------------------------|----------------|------------|
| Abnormal vaginal bleeding                                             | 36             | 45.0%      |
| Abdomino-pelvic mass                                                  | 20             | 25.0%      |
| Abnormal menses                                                       | 13             | 16.25%     |
| Lower abdominal pain                                                  | 7              | 8.75%      |
| Others (Fever, Tenesmus, Urinary system anomalies, Infertility, etc.) | 4              | 5.0%       |
